# Supplementary material for: Medical and neurobehavioural phenotypes in carriers of X-linked ichthyosis-associated genetic deletions in the UK Biobank
Source: PubMed Central journal article supplement (PMC7525778; doi:10.1136/jmedgenet-2019-106676), 2020-03-05
Supplement: jmedgenet-2019-106676supp001.pdf [file jmedgenet-2019-106676supp001.pdf]

**Supplementary Table 1.** ICD-10 medical diagnoses in male deletion carriers and male controls.

| UK<br>Biobank<br>diagnosis<br>code | ICD-10 descriptive code                                                    | Male<br>controls<br>affected | Male<br>controls<br>unaffected | Male<br>deletion<br>carriers<br>affected | Male<br>deletion<br>carriers<br>unaffected | Prevalence in<br>male<br>controls | Prevalence in<br>male<br>deletion<br>carriers | Statistics                    | Benjamini-<br>Hochberg<br>corrected p-<br>value<br>(FDR<0.1) |
|------------------------------------|----------------------------------------------------------------------------|------------------------------|--------------------------------|------------------------------------------|--------------------------------------------|-----------------------------------|-----------------------------------------------|-------------------------------|--------------------------------------------------------------|
| 1429                               | Skin of other and unspecified parts of face                                | 2880                         | 187697                         | 5                                        | 81                                         | 1.5                               | 5.8                                           | p=0.01                        | 0.045                                                        |
| 1522                               | Malignant neoplasm of prostate                                             | 5192                         | 185385                         | 3                                        | 83                                         | 2.7                               | 3.5                                           | p=0.51                        | 0.653                                                        |
| 3704                               | Cataract, unspecified                                                      | 5573                         | 185004                         | 3                                        | 83                                         | 2.9                               | 3.5                                           | p=0.742                       | 0.742                                                        |
| 4231                               | Atrial fibrillation and flutter                                            | 5193                         | 185384                         | 9                                        | 77                                         | 2.7                               | 10.5                                          | p=0.001                       | 0.009                                                        |
| 5004                               | Unilateral or unspecified inguinal hernia, without obstruction or gangrene | 13031                        | 177546                         | 4                                        | 82                                         | 6.8                               | 4.7                                           | $\chi^2[1]=0.348,$<br>p=0.555 | 0.653                                                        |
| 5058                               | Non-infective gastro-enteritis and colitis, unspecified                    | 3930                         | 186647                         | 3                                        | 83                                         | 2.1                               | 3.5                                           | p=0.262                       | 0.59                                                         |
| 5078                               | Diverticular disease of large intestine without perforation or abscess     | 5645                         | 184932                         | 5                                        | 81                                         | 3.0                               | 5.8                                           | p=0.112                       | 0.336                                                        |
| 12318                              | Other and unspecified abdominal pain                                       | 4614                         | 185963                         | 3                                        | 83                                         | 2.4                               | 3.5                                           | p=0.467                       | 0.653                                                        |
| 12388                              | Unspecified haematuria                                                     | 7459                         | 183118                         | 4                                        | 82                                         | 3.9                               | 4.7                                           | p=0.581                       | 0.653                                                        |

**Supplementary Table 2.** ICD-10 medical diagnoses in female deletion carriers and female controls.

| UK Biobank diagnosis code | ICD-10 descriptive code                                           | Female controls affected | Female controls unaffected | Female deletion carriers affected | Female deletion carriers unaffected | Prevalence in female controls | Prevalence in female deletion carriers | Statistics                    | Benjamini-Hochberg corrected p-value (FDR<0.1) |
|---------------------------|-------------------------------------------------------------------|--------------------------|----------------------------|-----------------------------------|-------------------------------------|-------------------------------|----------------------------------------|-------------------------------|------------------------------------------------|
| 1945                      | Leiomyoma of uterus, unspecified                                  | 5357                     | 222505                     | 9                                 | 303                                 | 2.4                           | 2.9                                    | $\chi^2[1]=0.189$ , $p=0.664$ | 1.000                                          |
| 3401                      | Carpal tunnel syndrome                                            | 6662                     | 221200                     | 9                                 | 303                                 | 2.9                           | 2.9                                    | $\chi^2[1]=0.000$ , $p>0.99$  | 1.000                                          |
| 3704                      | Cataract, unspecified                                             | 7141                     | 220721                     | 13                                | 299                                 | 3.1                           | 4.2                                    | $\chi^2[1]=0.781$ , $p=0.377$ | 1.000                                          |
| 4429                      | Varicose veins of lower extremities without ulcer or inflammation | 6948                     | 220914                     | 8                                 | 304                                 | 3.0                           | 2.6                                    | $\chi^2[1]=0.111$ , $p=0.739$ | 1.000                                          |
| 5029                      | Diaphragmatic hernia without obstruction or gangrene              | 6265                     | 221597                     | 12                                | 300                                 | 2.7                           | 3.8                                    | $\chi^2[1]=1.021$ , $p=0.312$ | 1.000                                          |
| 5058                      | Non-infective gastro-enteritis and colitis, unspecified           | 6536                     | 221326                     | 9                                 | 303                                 | 2.9                           | 2.9                                    | $\chi^2[1]=0.000$ , $p>0.99$  | 1.000                                          |
| 6570                      | Gonarthrosis, unspecified                                         | 5379                     | 222483                     | 9                                 | 303                                 | 2.4                           | 2.9                                    | $\chi^2[1]=0.179$ , $p=0.673$ | 1.000                                          |
| 10640                     | Postmenopausal bleeding                                           | 7099                     | 220763                     | 11                                | 301                                 | 3.1                           | 3.5                                    | $\chi^2[1]=0.064$ , $p=0.800$ | 1.000                                          |
| 12318                     | Other and unspecified abdominal pain                              | 8539                     | 219323                     | 11                                | 301                                 | 3.7                           | 3.5                                    | $\chi^2[1]=0.003$ , $p=0.955$ | 1.000                                          |
| 12461                     | Headache                                                          | 3294                     | 224568                     | 8                                 | 304                                 | 1.4                           | 2.6                                    | $p=0.097$                     | 0.970                                          |
| 1429                      | Skin of other and unspecified parts of face                       | 2804                     | 225058                     | 1                                 | 311                                 | 1.2                           | 0.3                                    | $p=0.196$                     | -                                              |
| 4231                      | Atrial fibrillation and flutter                                   | 2551                     | 225311                     | 3                                 | 309                                 | 1.1                           | 1.0                                    | $p>0.99$                      | -                                              |

**Supplementary Table 3.** ICD-10 mental health diagnoses in male deletion carriers and male controls.

| Class of disorder       | Subclass of disorder     | UK Biobank diagnosis code      | ICD-10 descriptive code                             | Male controls affected                | Male controls unaffected | Male deletion carriers affected | Male deletion carriers unaffected | Prevalence in male controls | Prevalence in male deletion carriers | P-value |
|-------------------------|--------------------------|--------------------------------|-----------------------------------------------------|---------------------------------------|--------------------------|---------------------------------|-----------------------------------|-----------------------------|--------------------------------------|---------|
| Developmental disorders | Autism-related disorders | 3210                           | Childhood autism                                    |                                       |                          |                                 |                                   |                             |                                      |         |
|                         |                          | 3121                           | Atypical autism                                     |                                       |                          |                                 |                                   |                             |                                      |         |
|                         |                          | 3123                           | Other childhood disintegrative disorder             | 20                                    | 190557                   | 0                               | 86                                | 0.0                         | 0.0                                  | >0.99   |
|                         |                          | 3125                           | Asperger's syndrome                                 |                                       |                          |                                 |                                   |                             |                                      |         |
|                         |                          | 3126                           | Other pervasive developmental disorders             |                                       |                          |                                 |                                   |                             |                                      |         |
|                         |                          | 3127                           | Pervasive developmental disorder, unspecified       |                                       |                          |                                 |                                   |                             |                                      |         |
|                         |                          | Hyperkinetic disorder          | 3131                                                | Disturbance of activity and attention |                          |                                 |                                   |                             |                                      |         |
|                         | 3132                     |                                | Hyperkinetic conduct disorder                       | 0                                     | 190577                   | 0                               | 86                                | 0.0                         | 0.0                                  | >0.99   |
|                         | 3133                     |                                | Other hyperkinetic disorders                        |                                       |                          |                                 |                                   |                             |                                      |         |
|                         | 3134                     |                                | Hyperkinetic disorder, unspecified                  |                                       |                          |                                 |                                   |                             |                                      |         |
|                         | Conduct disorders        | 3136                           | Conduct disorder confined to the family context     |                                       |                          |                                 |                                   |                             |                                      |         |
|                         |                          | 3137                           | Unsocialised conduct disorder                       |                                       |                          |                                 |                                   |                             |                                      |         |
|                         |                          | 3138                           | Socialised conduct disorder                         |                                       |                          |                                 |                                   |                             |                                      |         |
|                         |                          | 3139                           | Oppositional defiant disorder                       |                                       |                          |                                 |                                   |                             |                                      |         |
|                         |                          | 3140                           | Other conduct disorders                             | 2                                     | 190575                   | 0                               | 86                                | 0.0                         | 0.0                                  | >0.99   |
|                         |                          | 3141                           | Conduct disorder, unspecified                       |                                       |                          |                                 |                                   |                             |                                      |         |
|                         |                          | 3143                           | Depressive conduct disorder                         |                                       |                          |                                 |                                   |                             |                                      |         |
|                         | Dyslexia and alexia      | 3144                           | Other mixed disorders of conduct and emotions       |                                       |                          |                                 |                                   |                             |                                      |         |
|                         |                          | 3145                           | Mixed disorder of conduct and emotions, unspecified |                                       |                          |                                 |                                   |                             |                                      |         |
|                         | Schizophrenia            | 12446                          | Dyslexia and alexia                                 | 0                                     | 190577                   | 0                               | 86                                | 0.0                         | 0.0                                  | >0.99   |
|                         |                          | 2864                           | Paranoid schizophrenia                              |                                       |                          |                                 |                                   |                             |                                      |         |
|                         |                          | 2865                           | Hebephrenic schizophrenia                           |                                       |                          |                                 |                                   |                             |                                      |         |
|                         |                          | 2866                           | Catatonic schizophrenia                             |                                       |                          |                                 |                                   |                             |                                      |         |
| 2867                    |                          | Undifferentiated schizophrenia |                                                     |                                       |                          |                                 |                                   |                             |                                      |         |
| 2868                    |                          | Postschizophrenic depression   | 175                                                 | 190402                                | 0                        | 86                              | 0.1                               | 0.0                         | >0.99                                |         |
| 2869                    |                          | Residual schizophrenia         |                                                     |                                       |                          |                                 |                                   |                             |                                      |         |
| 2870                    |                          | Simple schizophrenia           |                                                     |                                       |                          |                                 |                                   |                             |                                      |         |
| 2871                    |                          | Other schizophrenia            |                                                     |                                       |                          |                                 |                                   |                             |                                      |         |
| 2872                    |                          | Schizophrenia, unspecified     |                                                     |                                       |                          |                                 |                                   |                             |                                      |         |
| 2873                    | Schizotypal disorder     |                                |                                                     |                                       |                          |                                 |                                   |                             |                                      |         |

**Mood and anxiety disorders**

|                        |                     |                                                                                          |                                                                                  |        |        |    |     |     |       |       |
|------------------------|---------------------|------------------------------------------------------------------------------------------|----------------------------------------------------------------------------------|--------|--------|----|-----|-----|-------|-------|
| Mania/bipolar disorder | 2895                | Hypomania                                                                                |                                                                                  |        |        |    |     |     |       |       |
|                        | 2896                | Mania without psychotic symptoms                                                         |                                                                                  |        |        |    |     |     |       |       |
|                        | 2897                | Mania with psychotic symptoms                                                            |                                                                                  |        |        |    |     |     |       |       |
|                        | 2898                | Other manic episodes                                                                     |                                                                                  |        |        |    |     |     |       |       |
|                        | 2899                | Manic episode, unspecified                                                               |                                                                                  |        |        |    |     |     |       |       |
|                        | 2901                | Bipolar affective disorder, current episode hypomanic                                    |                                                                                  |        |        |    |     |     |       |       |
|                        | 2902                | Bipolar affective disorder, current episode manic without psychotic symptoms             |                                                                                  |        |        |    |     |     |       |       |
|                        | 2903                | Bipolar affective disorder, current episode manic with psychotic symptoms                | 214                                                                              | 190363 | 0      | 86 | 0.1 | 0.0 | >0.99 |       |
|                        | 2904                | Bipolar affective disorder, current episode mild or moderate depression                  |                                                                                  |        |        |    |     |     |       |       |
|                        | 2905                | Bipolar affective disorder, current episode severe depression without psychotic symptoms |                                                                                  |        |        |    |     |     |       |       |
|                        | 2906                | Bipolar affective disorder, current episode severe depression with psychotic symptoms    |                                                                                  |        |        |    |     |     |       |       |
|                        | 2907                | Bipolar affective disorder, current episode mixed                                        |                                                                                  |        |        |    |     |     |       |       |
|                        | 2908                | Bipolar affective disorder, currently in remission                                       |                                                                                  |        |        |    |     |     |       |       |
|                        | 2909                | Other bipolar affective disorders                                                        |                                                                                  |        |        |    |     |     |       |       |
|                        | 2910                | Bipolar affective disorder, unspecified                                                  |                                                                                  |        |        |    |     |     |       |       |
|                        | Depressive disorder | 2912                                                                                     | Mild depressive episode                                                          |        |        |    |     |     |       |       |
|                        |                     | 2913                                                                                     | Moderate depressive episode                                                      |        |        |    |     |     |       |       |
|                        |                     | 2914                                                                                     | Severe depressive episode without psychotic symptoms                             |        |        |    |     |     |       |       |
|                        |                     | 2915                                                                                     | Severe depressive episode with psychotic symptoms                                |        |        |    |     |     |       |       |
|                        |                     | 2916                                                                                     | Other depressive episodes                                                        |        |        |    |     |     |       |       |
|                        |                     | 2917                                                                                     | Depressive episode, unspecified                                                  |        |        |    |     |     |       |       |
|                        |                     | 2919                                                                                     | Recurrent depressive disorder, current episode mild                              | 587    | 189990 | 0  | 86  | 0.3 | 0.0   | >0.99 |
|                        |                     | 2920                                                                                     | Recurrent depressive disorder, current episode moderate                          |        |        |    |     |     |       |       |
|                        |                     | 2921                                                                                     | Recurrent depressive disorder, current episode severe without psychotic symptoms |        |        |    |     |     |       |       |
|                        |                     | 2922                                                                                     | Recurrent depressive disorder, current episode severe with psychotic symptoms    |        |        |    |     |     |       |       |
|                        |                     | 2923                                                                                     | Recurrent depressive disorder, currently in remission                            |        |        |    |     |     |       |       |
|                        |                     | 2924                                                                                     | Other recurrent depressive disorders                                             |        |        |    |     |     |       |       |
|                        |                     | 2925                                                                                     | Recurrent depressive disorder, unspecified                                       |        |        |    |     |     |       |       |
|                        | 2937                | Agoraphobia                                                                              |                                                                                  |        |        |    |     |     |       |       |

## Anxiety disorder

|      |                                              |     |        |   |    |     |     |       |
|------|----------------------------------------------|-----|--------|---|----|-----|-----|-------|
| 2938 | Social phobias                               |     |        |   |    |     |     |       |
| 2939 | Specific (isolated) phobias                  |     |        |   |    |     |     |       |
| 2940 | Other phobic anxiety disorders               |     |        |   |    |     |     |       |
| 2941 | Phobic anxiety disorder, unspecified         |     |        |   |    |     |     |       |
| 2943 | Panic disorder [episodic paroxysmal anxiety] | 236 | 190341 | 0 | 86 | 0.1 | 0.0 | >0.99 |
| 2944 | Generalised anxiety disorder                 |     |        |   |    |     |     |       |
| 2945 | Mixed anxiety and depressive disorder        |     |        |   |    |     |     |       |
| 2946 | Other mixed anxiety disorders                |     |        |   |    |     |     |       |
| 2947 | Other specified anxiety disorders            |     |        |   |    |     |     |       |
| 2948 | Anxiety disorder, unspecified                |     |        |   |    |     |     |       |

## Obsessive Compulsive Disorder

|      |                                                     |    |        |   |    |     |     |       |
|------|-----------------------------------------------------|----|--------|---|----|-----|-----|-------|
| 2950 | Predominantly obsessional thoughts or ruminations   |    |        |   |    |     |     |       |
| 2951 | Predominantly compulsive acts [obsessional rituals] |    |        |   |    |     |     |       |
| 2952 | Mixed obsessional thoughts and acts                 | 19 | 190558 | 0 | 86 | 0.0 | 0.0 | >0.99 |
| 2953 | Other obsessive-compulsive disorders                |    |        |   |    |     |     |       |
| 2954 | Obsessive-compulsive disorder, unspecified          |    |        |   |    |     |     |       |

**Supplementary Table 4.** ICD-10 mental health diagnoses in female deletion carriers and female controls.

|                            |                          | UK<br>Biobank<br>diagnosis<br>code | ICD-10 descriptive code                         | Female<br>controls<br>affected                      | Female<br>controls<br>unaffected | Female<br>deletion<br>carriers<br>affected | Female<br>deletion<br>carriers<br>unaffected | Prevalence<br>in female<br>controls | Prevalence<br>in female<br>deletion<br>carriers | P-value |
|----------------------------|--------------------------|------------------------------------|-------------------------------------------------|-----------------------------------------------------|----------------------------------|--------------------------------------------|----------------------------------------------|-------------------------------------|-------------------------------------------------|---------|
| Developmental<br>disorders | Autism-related disorders | 3210                               | Childhood autism                                |                                                     |                                  |                                            |                                              |                                     |                                                 |         |
|                            |                          | 3211                               | Atypical autism                                 |                                                     |                                  |                                            |                                              |                                     |                                                 |         |
|                            |                          | 3123                               | Other childhood disintegrative disorder         | 20                                                  | 227842                           | 0                                          | 312                                          | 0.0                                 | 0.0                                             | >0.99   |
|                            |                          | 3125                               | Asperger's syndrome                             |                                                     |                                  |                                            |                                              |                                     |                                                 |         |
|                            |                          | 3126                               | Other pervasive developmental disorders         |                                                     |                                  |                                            |                                              |                                     |                                                 |         |
|                            |                          | 3127                               | Pervasive developmental disorder, unspecified   |                                                     |                                  |                                            |                                              |                                     |                                                 |         |
|                            |                          | Hyperkinetic disorder              | 3131                                            | Disturbance of activity and attention               |                                  |                                            |                                              |                                     |                                                 |         |
|                            | 3132                     |                                    | Hyperkinetic conduct disorder                   | 0                                                   | 227862                           | 0                                          | 312                                          | 0.0                                 | 0.0                                             | >0.99   |
|                            | 3133                     |                                    | Other hyperkinetic disorders                    |                                                     |                                  |                                            |                                              |                                     |                                                 |         |
|                            | 3134                     |                                    | Hyperkinetic disorder, unspecified              |                                                     |                                  |                                            |                                              |                                     |                                                 |         |
|                            | Conduct disorders        | 3136                               | Conduct disorder confined to the family context |                                                     |                                  |                                            |                                              |                                     |                                                 |         |
|                            |                          | 3137                               | Unsocialised conduct disorder                   |                                                     |                                  |                                            |                                              |                                     |                                                 |         |
|                            |                          | 3138                               | Socialised conduct disorder                     |                                                     |                                  |                                            |                                              |                                     |                                                 |         |
|                            |                          | 3139                               | Oppositional defiant disorder                   |                                                     |                                  |                                            |                                              |                                     |                                                 |         |
|                            |                          | 3140                               | Other conduct disorders                         | 0                                                   | 227862                           | 0                                          | 312                                          | 0.0                                 | 0.0                                             | >0.99   |
|                            |                          | 3141                               | Conduct disorder, unspecified                   |                                                     |                                  |                                            |                                              |                                     |                                                 |         |
|                            |                          | 3143                               | Depressive conduct disorder                     |                                                     |                                  |                                            |                                              |                                     |                                                 |         |
|                            |                          | 3144                               | Other mixed disorders of conduct and emotions   |                                                     |                                  |                                            |                                              |                                     |                                                 |         |
|                            |                          |                                    | 3145                                            | Mixed disorder of conduct and emotions, unspecified |                                  |                                            |                                              |                                     |                                                 |         |
|                            | Dyslexia and alexia      | 12446                              | Dyslexia and alexia                             | 2                                                   | 227860                           | 0                                          | 312                                          | 0.0                                 | 0.0                                             | >0.99   |
|                            | Schizophrenia            | 2864                               | Paranoid schizophrenia                          |                                                     |                                  |                                            |                                              |                                     |                                                 |         |
|                            |                          | 2865                               | Hebephrenic schizophrenia                       |                                                     |                                  |                                            |                                              |                                     |                                                 |         |
|                            |                          | 2866                               | Catatonic schizophrenia                         |                                                     |                                  |                                            |                                              |                                     |                                                 |         |
| 2867                       |                          | Undifferentiated schizophrenia     |                                                 |                                                     |                                  |                                            |                                              |                                     |                                                 |         |
| 2868                       |                          | Postschizophrenic depression       | 87                                              | 227775                                              | 0                                | 312                                        | 0.0                                          | 0.0                                 | >0.99                                           |         |
| 2869                       |                          | Residual schizophrenia             |                                                 |                                                     |                                  |                                            |                                              |                                     |                                                 |         |
| 2870                       |                          | Simple schizophrenia               |                                                 |                                                     |                                  |                                            |                                              |                                     |                                                 |         |
| 2871                       |                          | Other schizophrenia                |                                                 |                                                     |                                  |                                            |                                              |                                     |                                                 |         |
| 2872                       |                          | Schizophrenia, unspecified         |                                                 |                                                     |                                  |                                            |                                              |                                     |                                                 |         |
| 2873                       |                          | Schizotypal disorder               |                                                 |                                                     |                                  |                                            |                                              |                                     |                                                 |         |

**Mood and anxiety disorders**

## Mania/bipolar disorder

|      |                                                                                          |     |        |   |     |     |     |       |
|------|------------------------------------------------------------------------------------------|-----|--------|---|-----|-----|-----|-------|
| 2895 | Hypomania                                                                                |     |        |   |     |     |     |       |
| 2896 | Mania without psychotic symptoms                                                         |     |        |   |     |     |     |       |
| 2897 | Mania with psychotic symptoms                                                            |     |        |   |     |     |     |       |
| 2898 | Other manic episodes                                                                     |     |        |   |     |     |     |       |
| 2899 | Manic episode, unspecified                                                               |     |        |   |     |     |     |       |
| 2901 | Bipolar affective disorder, current episode hypomanic                                    |     |        |   |     |     |     |       |
| 2902 | Bipolar affective disorder, current episode manic without psychotic symptoms             |     |        |   |     |     |     |       |
| 2903 | Bipolar affective disorder, current episode manic with psychotic symptoms                | 346 | 227516 | 0 | 312 | 0.2 | 0.0 | >0.99 |
| 2904 | Bipolar affective disorder, current episode mild or moderate depression                  |     |        |   |     |     |     |       |
| 2905 | Bipolar affective disorder, current episode severe depression without psychotic symptoms |     |        |   |     |     |     |       |
| 2906 | Bipolar affective disorder, current episode severe depression with psychotic symptoms    |     |        |   |     |     |     |       |
| 2907 | Bipolar affective disorder, current episode mixed                                        |     |        |   |     |     |     |       |
| 2908 | Bipolar affective disorder, currently in remission                                       |     |        |   |     |     |     |       |
| 2909 | Other bipolar affective disorders                                                        |     |        |   |     |     |     |       |
| 2910 | Bipolar affective disorder, unspecified                                                  |     |        |   |     |     |     |       |
| 2912 | Mild depressive episode                                                                  |     |        |   |     |     |     |       |
| 2913 | Moderate depressive episode                                                              |     |        |   |     |     |     |       |
| 2914 | Severe depressive episode without psychotic symptoms                                     |     |        |   |     |     |     |       |
| 2915 | Severe depressive episode with psychotic symptoms                                        |     |        |   |     |     |     |       |
| 2916 | Other depressive episodes                                                                |     |        |   |     |     |     |       |
| 2917 | Depressive episode, unspecified                                                          |     |        |   |     |     |     |       |
| 2919 | Recurrent depressive disorder, current episode mild                                      | 759 | 227103 | 1 | 311 | 0.3 | 0.3 | >0.99 |
| 2920 | Recurrent depressive disorder, current episode moderate                                  |     |        |   |     |     |     |       |
| 2921 | Recurrent depressive disorder, current episode severe without psychotic symptoms         |     |        |   |     |     |     |       |
| 2922 | Recurrent depressive disorder, current episode severe with psychotic symptoms            |     |        |   |     |     |     |       |
| 2923 | Recurrent depressive disorder, currently in remission                                    |     |        |   |     |     |     |       |
| 2924 | Other recurrent depressive disorders                                                     |     |        |   |     |     |     |       |
| 2925 | Recurrent depressive disorder, unspecified                                               |     |        |   |     |     |     |       |

|                               |      |                                                     |     |        |   |     |     |     |       |
|-------------------------------|------|-----------------------------------------------------|-----|--------|---|-----|-----|-----|-------|
| Anxiety disorder              | 2937 | Agoraphobia                                         |     |        |   |     |     |     |       |
|                               | 2938 | Social phobias                                      |     |        |   |     |     |     |       |
|                               | 2939 | Specific (isolated) phobias                         |     |        |   |     |     |     |       |
|                               | 2940 | Other phobic anxiety disorders                      |     |        |   |     |     |     |       |
|                               | 2941 | Phobic anxiety disorder, unspecified                |     |        |   |     |     |     |       |
|                               | 2943 | Panic disorder [episodic paroxysmal anxiety]        | 365 | 227497 | 1 | 311 | 0.2 | 0.3 | 0.394 |
|                               | 2944 | Generalised anxiety disorder                        |     |        |   |     |     |     |       |
|                               | 2945 | Mixed anxiety and depressive disorder               |     |        |   |     |     |     |       |
|                               | 2946 | Other mixed anxiety disorders                       |     |        |   |     |     |     |       |
|                               | 2947 | Other specified anxiety disorders                   |     |        |   |     |     |     |       |
| Obsessive Compulsive Disorder | 2948 | Anxiety disorder, unspecified                       |     |        |   |     |     |     |       |
|                               | 2950 | Predominantly obsessional thoughts or ruminations   |     |        |   |     |     |     |       |
|                               | 2951 | Predominantly compulsive acts [obsessional rituals] |     |        |   |     |     |     |       |
|                               | 2952 | Mixed obsessional thoughts and acts                 | 14  | 227848 | 0 | 312 | 0.0 | 0.0 | >0.99 |
|                               | 2953 | Other obsessive-compulsive disorders                |     |        |   |     |     |     |       |
|                               | 2954 | Obsessive-compulsive disorder, unspecified          |     |        |   |     |     |     |       |



**Supplementary Table 5.** Non-cancer illnesses in male deletion carriers and male controls.

| Body system              | UK Biobank non-cancer illness code | Non-cancer illness                    | Male controls affected | Male controls unaffected | Male deletion carriers affected | Male deletion carriers unaffected | Prevalence in male controls | Prevalence in male deletion carriers | P-value | Benjamini-Hochberg corrected p-value (FDR<0.1) |
|--------------------------|------------------------------------|---------------------------------------|------------------------|--------------------------|---------------------------------|-----------------------------------|-----------------------------|--------------------------------------|---------|------------------------------------------------|
| Heart and cardiovascular | 1066                               | Heart/cardiac problem                 | 688                    | 189889                   | 0                               | 86                                | 0.4                         | 0.0                                  | >0.99   | >0.99                                          |
|                          | 1077                               | Heart arrhythmia                      | 1167                   | 189410                   | 3                               | 83                                | 0.6                         | 3.5                                  | 0.016   | 0.208                                          |
|                          | 1471                               | Atrial fibrillation                   | 2355                   | 188222                   | 1                               | 85                                | 1.2                         | 1.2                                  | >0.99   | >0.99                                          |
|                          | 1483                               | Atrial flutter                        | 72                     | 190505                   | 1                               | 85                                | 0.0                         | 1.2                                  | 0.032   | 0.250                                          |
|                          | 1485                               | Irregular heartbeat                   | 412                    | 190165                   | 0                               | 86                                | 0.2                         | 0.0                                  | >0.99   | >0.99                                          |
| Reproductive             | 1214                               | Testicular problems (not cancer)      | 593                    | 189984                   | 0                               | 86                                | 0.3                         | 0.0                                  | >0.99   | >0.99                                          |
|                          | 1404                               | Male infertility                      | 27                     | 190550                   | 0                               | 86                                | 0.0                         | 0.0                                  | >0.99   | >0.99                                          |
|                          | 1679                               | Undescended testicle                  | 188                    | 190389                   | 0                               | 86                                | 0.1                         | 0.0                                  | >0.99   | >0.99                                          |
| Thyroid                  | 1224                               | Thyroid problem (not cancer)          | 164                    | 190413                   | 0                               | 86                                | 0.1                         | 0.0                                  | >0.99   | >0.99                                          |
|                          | 1225                               | Hyperthyroidism                       | 586                    | 189991                   | 0                               | 86                                | 0.3                         | 0.0                                  | >0.99   | >0.99                                          |
|                          | 1226                               | Hypothyroidism                        | 3085                   | 187492                   | 1                               | 85                                | 1.6                         | 1.2                                  | >0.99   | >0.99                                          |
| Eye                      | 1278                               | Cataract                              | 2993                   | 187584                   | 3                               | 83                                | 1.6                         | 3.5                                  | 0.154   | 0.858                                          |
| Immune system            | 1374                               | Allergy/hypersensitivity/anaphylaxis  | 1015                   | 189562                   | 4                               | 82                                | 0.5                         | 4.7                                  | 0.001   | 0.020                                          |
| Skin                     | 1452                               | Eczema/dermatitis                     | 5108                   | 185469                   | 6                               | 80                                | 2.7                         | 7.0                                  | 0.028   | 0.250                                          |
|                          | 1453                               | Psoriasis                             | 2628                   | 187949                   | 1                               | 85                                | 1.4                         | 1.2                                  | >0.99   | >0.99                                          |
|                          | 1454                               | Blistering/desquamating skin disorder | 325                    | 190252                   | 4                               | 82                                | 0.2                         | 4.7                                  | <0.001  | <0.020                                         |
| Nervous                  |                                    |                                       |                        |                          |                                 |                                   |                             |                                      |         |                                                |

|        |      |                                           |      |        |   |    |     |     |       |       |
|--------|------|-------------------------------------------|------|--------|---|----|-----|-----|-------|-------|
| system | 1243 | Psychological/psychiatric problem         | 167  | 190410 | 0 | 86 | 0.1 | 0.0 | >0.99 | >0.99 |
|        | 1258 | Chronic/degenerative neurological problem | 66   | 190511 | 0 | 86 | 0.0 | 0.0 | >0.99 | >0.99 |
|        | 1259 | Motor neurone disease                     | 34   | 190543 | 0 | 86 | 0.0 | 0.0 | >0.99 | >0.99 |
|        | 1261 | Multiple sclerosis                        | 387  | 190190 | 0 | 86 | 0.2 | 0.0 | >0.99 | >0.99 |
|        | 1262 | Parkinson's Disease                       | 485  | 190092 | 0 | 86 | 0.3 | 0.0 | >0.99 | >0.99 |
|        | 1263 | Dementia/Alzheimer's/cognitive impairment | 65   | 190512 | 0 | 86 | 0.0 | 0.0 | >0.99 | >0.99 |
|        | 1264 | Epilepsy                                  | 1709 | 188868 | 1 | 85 | 0.9 | 1.2 | 0.539 | >0.99 |
|        | 1265 | Migraine                                  | 2894 | 187683 | 2 | 84 | 1.5 | 2.3 | 0.376 | >0.99 |
|        | 1286 | Depression                                | 8541 | 182036 | 2 | 84 | 4.5 | 2.3 | 0.595 | >0.99 |
|        | 1287 | Anxiety/panic attacks                     | 2120 | 188457 | 3 | 83 | 1.1 | 3.5 | 0.072 | 0.468 |
|        | 1288 | Nervous breakdown                         | 275  | 190302 | 0 | 86 | 0.1 | 0.0 | >0.99 | >0.99 |
|        | 1289 | Schizophrenia                             | 304  | 190273 | 0 | 86 | 0.2 | 0.0 | >0.99 | >0.99 |
|        | 1290 | Deliberate self-harm/suicide              | 82   | 190495 | 0 | 86 | 0.0 | 0.0 | >0.99 | >0.99 |
|        | 1291 | Mania/bipolar disorder                    | 508  | 190069 | 0 | 86 | 0.3 | 0.0 | >0.99 | >0.99 |
|        | 1408 | Alcohol dependency                        | 460  | 190117 | 0 | 86 | 0.2 | 0.0 | >0.99 | >0.99 |
|        | 1409 | Opioid dependency                         | 20   | 190557 | 0 | 86 | 0.0 | 0.0 | >0.99 | >0.99 |
|        | 1410 | Other substance abuse                     | 34   | 190543 | 0 | 86 | 0.0 | 0.0 | >0.99 | >0.99 |
|        | 1469 | Posttraumatic Stress Disorder             | 145  | 190432 | 0 | 86 | 0.1 | 0.0 | >0.99 | >0.99 |
|        | 1470 | Anorexia/bulimia                          | 15   | 190562 | 0 | 86 | 0.0 | 0.0 | >0.99 | >0.99 |
|        | 1531 | Postnatal depression                      | 1    | 190576 | 0 | 86 | 0.0 | 0.0 | >0.99 | >0.99 |
|        | 1614 | Stress                                    | 267  | 190310 | 0 | 86 | 0.1 | 0.0 | >0.99 | >0.99 |
|        | 1615 | Obsessive Compulsive Disorder             | 49   | 190528 | 0 | 86 | 0.0 | 0.0 | >0.99 | >0.99 |
|        | 1616 | Insomnia                                  | 119  | 190458 | 0 | 86 | 0.1 | 0.0 | >0.99 | >0.99 |

**Supplementary Table 6.** Non-cancer illnesses in female deletion carriers and female controls.

| Body system              | UK Biobank non-cancer illness code | Non-cancer illness                        | Female controls affected | Female controls unaffected | Female deletion carriers affected | Female deletion carriers unaffected | Prevalence in female controls | Prevalence in female deletion carriers | P-value                    | Benjamini-Hochberg corrected p-value (FDR<0.1) |
|--------------------------|------------------------------------|-------------------------------------------|--------------------------|----------------------------|-----------------------------------|-------------------------------------|-------------------------------|----------------------------------------|----------------------------|------------------------------------------------|
| Heart and cardiovascular | 1066                               | Heart/cardiac problem                     | 666                      | 227196                     | 2                                 | 310                                 | 0.3                           | 0.6                                    | 0.232                      | >0.99                                          |
|                          | 1077                               | Heart arrythmia                           | 1147                     | 226715                     | 2                                 | 310                                 | 0.5                           | 0.6                                    | 0.673                      | >0.99                                          |
|                          | 1471                               | Atrial fibrillation                       | 1084                     | 226778                     | 0                                 | 312                                 | 0.5                           | 0.0                                    | 0.412                      | >0.99                                          |
|                          | 1483                               | Atrial flutter                            | 26                       | 227836                     | 0                                 | 312                                 | 0.0                           | 0.0                                    | >0.99                      | >0.99                                          |
|                          | 1485                               | Irregular heartbeat                       | 389                      | 227473                     | 0                                 | 312                                 | 0.2                           | 0.0                                    | >0.99                      | >0.99                                          |
| Reproductive             | 1402                               | Endometriosis                             | 3556                     | 224306                     | 1                                 | 311                                 | 1.6                           | 0.3                                    | 0.102                      | >0.99                                          |
|                          | 1403                               | Female infertility                        | 516                      | 227346                     | 1                                 | 311                                 | 0.2                           | 0.3                                    | 0.507                      | >0.99                                          |
| Thyroid                  | 1224                               | Thyroid problem (not cancer)              | 946                      | 226916                     | 1                                 | 311                                 | 0.4                           | 0.3                                    | >0.99                      | >0.99                                          |
|                          | 1225                               | Hyperthyroidism                           | 2695                     | 225167                     | 5                                 | 307                                 | 1.2                           | 1.6                                    | 0.426                      | >0.99                                          |
|                          | 1226                               | Hypothyroidism                            | 17905                    | 209957                     | 23                                | 289                                 | 7.9                           | 7.4                                    | $\chi^2[1]=0.046, p=0.831$ | >0.99                                          |
| Eye                      | 1278                               | Cataract                                  | 3921                     | 223941                     | 6                                 | 306                                 | 1.7                           | 1.9                                    | $\chi^2[1]=0.003, p=0.955$ | >0.99                                          |
| Immune system            | 1374                               | Allergy/hypersensitivity/anaphylaxis      | 2035                     | 225827                     | 1                                 | 311                                 | 0.9                           | 0.3                                    | 0.536                      | >0.99                                          |
| Hair                     | 1667                               | Alopecia/hair loss                        | 66                       | 227796                     | 0                                 | 312                                 | 0.0                           | 0.0                                    | >0.99                      | >0.99                                          |
| Skin                     | 1452                               | Eczema/dermatitis                         | 6257                     | 221605                     | 9                                 | 303                                 | 2.7                           | 2.9                                    | $\chi^2[1]=0.000, p>0.99$  | >0.99                                          |
|                          | 1453                               | Psoriasis                                 | 2323                     | 225539                     | 6                                 | 306                                 | 1.0                           | 1.9                                    | 0.143                      | >0.99                                          |
|                          | 1454                               | Blistering/desquamating skin disorder     | 336                      | 227526                     | 0                                 | 312                                 | 0.1                           | 0.0                                    | >0.99                      | >0.99                                          |
| Nervous system           | 1243                               | Psychological/psychiatric problem         | 219                      | 227643                     | 0                                 | 312                                 | 0.1                           | 0.0                                    | >0.99                      | >0.99                                          |
|                          | 1258                               | Chronic/degenerative neurological problem | 81                       | 227781                     | 0                                 | 312                                 | 0.0                           | 0.0                                    | >0.99                      | >0.99                                          |

|      |                                           |       |        |    |     |     |     |                            |       |
|------|-------------------------------------------|-------|--------|----|-----|-----|-----|----------------------------|-------|
| 1259 | Motor neurone disease                     | 14    | 227848 | 0  | 312 | 0.0 | 0.0 | >0.99                      | >0.99 |
| 1261 | Multiple sclerosis                        | 1135  | 226727 | 3  | 309 | 0.5 | 1.0 | 0.205                      | >0.99 |
| 1262 | Parkinson's Disease                       | 283   | 227579 | 1  | 311 | 0.1 | 0.3 | 0.322                      | >0.99 |
| 1263 | Dementia/Alzheimer's/cognitive impairment | 51    | 227811 | 0  | 312 | 0.0 | 0.0 | >0.99                      | >0.99 |
| 1264 | Epilepsy                                  | 1775  | 226087 | 3  | 309 | 0.8 | 1.0 | 0.526                      | >0.99 |
| 1265 | Migraine                                  | 10083 | 217779 | 7  | 305 | 4.4 | 2.2 | $\chi^2[1]=3.011, p=0.083$ | >0.99 |
| 1286 | Depression                                | 16496 | 211366 | 27 | 285 | 7.2 | 8.7 | $\chi^2[1]=0.729, p=0.393$ | >0.99 |
| 1287 | Anxiety/panic attacks                     | 3959  | 223903 | 6  | 306 | 1.7 | 1.9 | $\chi^2[1]=0.001, p=0.973$ | >0.99 |
| 1288 | Nervous breakdown                         | 366   | 227496 | 0  | 312 | 0.2 | 0.0 | >0.99                      | >0.99 |
| 1289 | Schizophrenia                             | 147   | 227715 | 0  | 312 | 0.1 | 0.0 | >0.99                      | >0.99 |
| 1290 | Deliberate self-harm/suicide              | 110   | 227752 | 0  | 312 | 0.0 | 0.0 | >0.99                      | >0.99 |
| 1291 | Mania/bipolar disorder                    | 657   | 227205 | 1  | 311 | 0.3 | 0.3 | 0.594                      | >0.99 |
| 1408 | Alcohol dependency                        | 177   | 227685 | 0  | 312 | 0.1 | 0.0 | >0.99                      | >0.99 |
| 1409 | Opioid dependency                         | 5     | 227857 | 0  | 312 | 0.0 | 0.0 | >0.99                      | >0.99 |
| 1410 | Other substance abuse                     | 14    | 227848 | 0  | 312 | 0.0 | 0.0 | >0.99                      | >0.99 |
| 1469 | Posttraumatic Stress Disorder             | 150   | 227712 | 0  | 312 | 0.1 | 0.0 | >0.99                      | >0.99 |
| 1470 | Anorexia/bulimia                          | 314   | 227548 | 0  | 312 | 0.1 | 0.0 | >0.99                      | >0.99 |
| 1531 | Postnatal depression                      | 401   | 227461 | 0  | 312 | 0.2 | 0.0 | >0.99                      | >0.99 |
| 1614 | Stress                                    | 374   | 227488 | 2  | 310 | 0.2 | 0.6 | 0.094                      | >0.99 |
| 1615 | Obsessive Compulsive Disorder             | 48    | 227814 | 0  | 312 | 0.0 | 0.0 | >0.99                      | >0.99 |
| 1616 | Insomnia                                  | 296   | 227566 | 0  | 312 | 0.1 | 0.0 | >0.99                      | >0.99 |

**Supplementary Table 7.** Mental Health Questionnaire (MHQ) responses in male deletion carriers and male controls.

**Depression**

| <i>Dual answer questions</i>                                                                          | Male control          | Male deletion  | Statistics                 |
|-------------------------------------------------------------------------------------------------------|-----------------------|----------------|----------------------------|
| Ever had prolonged feelings of sadness or depression? (Yes/No)                                        | 25669(44%)/33052(56%) | 15(75%)/5(25%) | $\chi^2[1]=6.733, p=0.009$ |
| Ever had prolonged loss of interest in normal activities? (Yes/No)                                    | 18460(31%)/40257(69%) | 13(62%)/8(38%) | $\chi^2[1]=7.680, p=0.006$ |
| Depression possibly related to stressful or traumatic event (Yes/No)                                  | 17354/9770            | 10/6           | $\chi^2[1]=0.000, p>0.99$  |
| Feelings of tiredness during worst episode of depression (Yes/No)                                     | 18384/5915            | 12/3           | $p>0.99$                   |
| Did your sleep change? (Yes/No)                                                                       | 17353/6075            | 12/4           | $p>0.99$                   |
| Trouble falling asleep (Yes/No)                                                                       | 13225/4128            | 8/4            | $p=0.496$                  |
| Sleeping too much (Yes/No)                                                                            | 3417/13936            | 3/9            | $p=0.714$                  |
| Waking too early (Yes/No)                                                                             | 13086/4267            | 8/4            | $p=0.505$                  |
| Difficulty concentrating during worst depression (Yes/No)                                             | 18463/6009            | 15/1           | $p=0.141$                  |
| Feelings of worthlessness during worst episode of depression (Yes/No)                                 | 12321/13251           | 11/5           | $\chi^2[1]=1.948, p=0.163$ |
| Thoughts of death during worst depression (Yes/No)                                                    | 11891/13902           | 5/10           | $\chi^2[1]=0.537, p=0.464$ |
| Depression possibly related to childbirth (Yes/No)                                                    | -                     | -              | -                          |
| Professional informed about depression (Yes/No)                                                       | 15373/11745           | 8/8            | $\chi^2[1]=0.083, p=0.774$ |
| Substances taken for depression (unprescribed)(Yes/No)                                                | 1236/57619            | 1/20           | $p=0.360$                  |
| Substances taken for depression (prescribed)(Yes/No)                                                  | 9914/48941            | 5/16           | $p=0.382$                  |
| Substances taken for depression (drugs or alcohol)(Yes/No)                                            | 4566/54289            | 2/19           | $p=0.676$                  |
| Talking therapies (Yes/No)                                                                            | 9046/49809            | 5/16           | $p=0.356$                  |
| Other non-drug therapies (e.g. yoga) (Yes/No)                                                         | 2334/56521            | 2/19           | $p=0.202$                  |
| <i>Multiple answer questions</i>                                                                      |                       |                |                            |
| Trouble falling or staying asleep, or sleeping too much (1: not at all-4:nearly every day)            | 1.74±0.006            | 2.07±0.267     | U=519025.5, $p=0.153$      |
| Recent feelings of inadequacy (1: not at all-4:nearly every day)                                      | 1.34±0.005            | 1.57±0.228     | U=511192, $p=0.039$        |
| Recent trouble concentrating on things (1: not at all-4:nearly every day)                             | 1.33±0.005            | 1.57±0.228     | U=487101, $p=0.011$        |
| Recent feelings of depression (1: not at all-4:nearly every day)                                      | 1.36±0.005            | 1.64±0.248     | U=519805.5, $p=0.072$      |
| Recent poor appetite or overeating (1: not at all-4:nearly every day)                                 | 1.28±0.005            | 1.36±0.225     | U=582574.5, $p=0.450$      |
| Recent thoughts of suicide or self-harm (1: not at all-4:nearly every day)                            | 1.10±0.003            | 1.29±0.221     | U=552023.5, $p=0.024$      |
| Recent lack of interest or pleasure in doing things (1: not at all-4:nearly every day)                | 1.34±0.005            | 1.57±0.228     | U=490482.5, $p=0.015$      |
| Recent changes in speed/amount of moving or speaking (1: not at all-4:nearly every day)               | 1.11±0.003            | 1.36±0.225     | U=561630, $p=0.069$        |
| Recent feelings of tiredness or low energy (1: not at all-4:nearly every day)                         | 1.76±0.006            | 2.00±0.234     | U=499865.5, $p=0.196$      |
| Fraction of day affected during worst episode of depression (1:less than half the day-4:all day long) | 2.76±0.007            | 2.93±0.245     | U=177823.5, $p=0.614$      |
| Frequency of depressed days during worst episode of depression (1:less often-3:every day)             | 2.23±0.004            | 2.21±0.214     | U=180055.5, $p=0.510$      |

|                                                                                                                                                             |                                 |                     |                     |
|-------------------------------------------------------------------------------------------------------------------------------------------------------------|---------------------------------|---------------------|---------------------|
| Weight change during worst episode of depression (0: stayed about the same or was on a diet, 1:gained weight, 2:lost weight, 3:both gained and lost weight) | 0:12603, 1:3055, 2:5651, 3:1175 | 0:13, 1:2, 2:1, 3:0 | p=0.213             |
| Duration of worst depression (1:less than a month-6:over two years)                                                                                         | 2.88±0.011                      | 3.07±0.438          | U=201796, p=0.660   |
| Impact on normal roles during worst episode of depression (0:not at all-3:a lot)                                                                            | 1.95±0.006                      | 2.00±0.234          | U=215475.5, p=0.949 |
| Age at first episode of depression (yrs)                                                                                                                    | 39.29±0.104                     | 37.71±4.876         | U=185977.5, p=0.659 |
| Age at last episode of depression (yrs)                                                                                                                     | 49.30±0.091                     | 55.21±2.689         | U=145534, p=0.188   |
| Lifetime number of depressed periods                                                                                                                        | 145.17±2.420                    | 287.79±124.757      | U=147693.5, p=0.072 |

## Mania

### Dual answer questions

|                                                                                 |                       |                 |                            |
|---------------------------------------------------------------------------------|-----------------------|-----------------|----------------------------|
| Manifestations of mania (more talkative than usual) (Yes/No)                    | 2896/55959            | 2/19            | p=0.277                    |
| Manifestations of mania (more restless than usual)(Yes/No)                      | 6607/52248            | 5/16            | p=0.079                    |
| Manifestations of mania (my thoughts were racing)(Yes/No)                       | 5337/53518            | 4/17            | p=0.117                    |
| Manifestations of mania (needed less sleep than usual)(Yes/No)                  | 1978/56877            | 2/19            | p=0.156                    |
| Manifestations of mania (more creative than usual)(Yes/No)                      | 1902/56953            | 0/21            | p>0.99                     |
| Manifestations of mania (was easily distracted)(Yes/No)                         | 4551/54304            | 4/17            | p=0.074                    |
| Manifestations of mania (was more confident than usual)(Yes/No)                 | 1992/56863            | 0/21            | p>0.99                     |
| Manifestations of mania (was more active than usual)(Yes/No)                    | 3019/55836            | 3/18            | p=0.090                    |
| Ever had a period of mania/excitability? (Yes/No)                               | 2814/54385            | 1/20            | p>0.99                     |
| Ever had a period of extreme irritability? (Yes/No)                             | 14245(25%)/43013(75%) | 10(48%)/11(52%) | $\chi^2[1]=4.654, p=0.031$ |
| Severity of problems due to mania or irritability (No problems/caused problems) | 8987/4173             | 4/5             | p=0.153                    |

### Multiple answer questions

|                                                                                |            |            |                  |
|--------------------------------------------------------------------------------|------------|------------|------------------|
| Longest period of mania or irritability (1: less than 24hrs-3: a week or more) | 1.86±0.007 | 2.13±0.350 | U=45749, p=0.396 |
|--------------------------------------------------------------------------------|------------|------------|------------------|

## Anxiety

### Dual answer questions

|                                                                               |                       |                |         |
|-------------------------------------------------------------------------------|-----------------------|----------------|---------|
| Ever felt worried, tense or anxious for most of a month or longer (Yes/No)    | 11828(21%)/44247(79%) | 9(43%)/12(57%) | p=0.027 |
| Ever worried more than most people would in similar situation (Yes/No)        | 10750/39424           | 7/10           | p=0.069 |
| Stronger worrying (than other people) during period of worst anxiety (Yes/No) | 8585/1581             | 6/1            | p>0.99  |
| Worried most days during period of worst anxiety (Yes/No)                     | 12058/2097            | 8/1            | p>0.99  |

|                                                                                               |                      |               |                |
|-----------------------------------------------------------------------------------------------|----------------------|---------------|----------------|
| Number of things worried about during worst period of anxiety (One thing/More than one thing) | 6743/7534            | 2/6           | p=0.295        |
| Difficulty stopping worrying during worst period of anxiety (Yes/No)                          | 13174/1095           | 7/1           | p=0.472        |
| Multiple worries during worst period of anxiety (Yes/No)                                      | 10070/4067           | 7/2           | p>0.99         |
| Tense, sore or aching muscles during worse period of anxiety (Yes/No)                         | 4173(31%)/9314(69%)  | 6(75%)/2(25%) | <b>p=0.013</b> |
| Difficulty concentrating during worst period of anxiety (Yes/No)                              | 10560/3599           | 9/0           | p=0.124        |
| More irritable than usual during worst period of anxiety (Yes/No)                             | 9967/3686            | 8/1           | p=0.460        |
| Restless during period of worst anxiety (Yes/No)                                              | 8577/5227            | 4/4           | p=0.487        |
| Keyed up or on edge during worst period of anxiety (Yes/No)                                   | 10917/3139           | 8/1           | p=0.694        |
| Frequent trouble falling or staying asleep during worst period of anxiety (Yes/No)            | 10850(76%)/3464(24%) | 4(44%)/5(56%) | <b>p=0.043</b> |
| Easily tired during worst period of anxiety (Yes/No)                                          | 8955/4786            | 6/3           | p>0.99         |
| Professional informed about anxiety (Yes/No)                                                  | 8376/6254            | 5/4           | p>0.99         |
| Substances taken for anxiety (unprescribed)(Yes/No)                                           | 901/57954            | 1/20          | p=0.277        |
| Substances taken for anxiety (prescribed)(Yes/No)                                             | 5748/53107           | 4/17          | p=0.143        |
| Substances taken for anxiety (drugs or alcohol) (Yes/No)                                      | 3191/55664           | 2/19          | p=0.317        |
| Activities undertaken to treat anxiety (talking therapies)(Yes/No)                            | 5495/53360           | 3/18          | p=0.440        |
| Activities undertaken to treat anxiety (other therapeutic activities e.g. yoga)(Yes/No)       | 1657/57198           | 1/20          | p=0.451        |

#### Multiple answer questions

|                                                                                            |            |            |                             |
|--------------------------------------------------------------------------------------------|------------|------------|-----------------------------|
| Recent easy annoyance or irritability (1: not at all-4:nearly every day)                   | 1.31±0.002 | 1.86±0.210 | <b>U=405199, p&lt;0.001</b> |
| Recent feelings of nervousness or anxiety (1: not at all-4:nearly every day)               | 1.28±0.002 | 1.62±0.234 | U=536245, p=0.159           |
| Recent inability to stop or control worrying (1: not at all-4:nearly every day)            | 1.23±0.002 | 1.48±0.178 | U=517872.5, p=0.058         |
| Recent feelings of foreboding (1: not at all-4:nearly every day)                           | 1.16±0.002 | 1.33±0.174 | U=571941, p=0.330           |
| Recent trouble relaxing (1: not at all-4:nearly every day)                                 | 1.31±0.003 | 1.52±0.178 | U=524358.5, p=0.109         |
| Recent restlessness (1: not at all-4:nearly every day)                                     | 1.14±0.002 | 1.38±0.161 | <b>U=506824.5, p=0.008</b>  |
| Recent worrying too much about different things (1: not at all-4:nearly every day)         | 1.31±0.003 | 1.62±0.212 | U=522739, p=0.112           |
| Longest period spent worried or anxious (months)                                           | 158±3      | 563±172    | <b>U=26962.5, p=0.010</b>   |
| Frequency of inability to stop worrying during worst period of anxiety (0:Never-3:Often)   | 2.19±0.006 | 2.56±0.176 | U=49519.5, p=0.165          |
| Frequency of difficulty controlling worry during worst period of anxiety (0:Never-3:Often) | 2.19±0.006 | 2.56±0.176 | U=55332.5, p=0.380          |
| Impact on normal roles during worst period of anxiety (0: Not at all-3: A lot)             | 1.89±0.008 | 2.22±0.222 | U=54027.5, p=0.319          |

#### Additions

|                                                                       |            |      |         |
|-----------------------------------------------------------------------|------------|------|---------|
| Ever addicted to any substance or behaviour (Yes/No)                  | 4080/54067 | 1/19 | p>0.99  |
| Ever addicted to alcohol (Yes/No)                                     | 1755/2025  | 1/0  | p=0.464 |
| Ongoing addiction to alcohol (Yes/No)                                 | 756/974    | 1/0  | p=0.437 |
| Ever physically dependent on alcohol (Yes/No)                         | 551/1132   | 0/1  | p>0.99  |
| Ever addicted to prescription or over-the-counter medication (Yes/No) | 466/3566   | 0/1  | p>0.99  |
| Ever addicted to illicit or recreational drugs (Yes/No)               | 358/3662   | 0/1  | p>0.99  |
| Ever addicted to a behaviour or miscellaneous                         | 1176/2833  | 1/0  | p=0.294 |
| Ongoing behavioural or miscellaneous addiction (Yes/No)               | 524/630    | 1/0  | p=0.455 |

**Alcohol use**

|                                                                                                                                                         |                         |                |                     |
|---------------------------------------------------------------------------------------------------------------------------------------------------------|-------------------------|----------------|---------------------|
| Frequency of drinking alcohol (0: Never-4: 4 or more times a week)                                                                                      | 2.87±0.005              | 2.90±0.194     | U=588100.5, p=0.697 |
| Amount of alcohol drunk on a typical drinking day (1: 1-2 units-5: 10 or more units)                                                                    | 2.11±0.005              | 1.52±0.190     | U=407457, p=0.013   |
| Frequency of consuming 6 or more units of alcohol (1: Never-5: daily or almost daily)                                                                   | 2.29±0.005              | 2.24±0.275     | U=574833.5, p=0.931 |
| Frequency of inability to cease drinking in last year (1: Never-5: daily or almost daily)                                                               | 1.18±0.003              | 1.00±0.000     | U=251328, p=0.203   |
| Frequency of failure to fulfil normal expectations due to drinking alcohol in last year (1: Never-5: daily or almost daily)                             | 1.09±0.002              | 1.14±0.097     | U=262675, p=0.364   |
| Frequency of needing morning drink of alcohol after heavy drinking session in last year (1: Never-5: daily or almost daily)                             | 1.01±0.001              | 1.00±0.000     | U=279118, p=0.759   |
| Frequency of feeling guilt or remorse after drinking alcohol in last year (1: Never-5: daily or almost daily)                                           | 1.25±0.003              | 1.07±0.071     | U=251369, p=0.303   |
| Frequency of memory loss due to drinking alcohol in the last year (1: Never-5: daily or almost daily)                                                   | 1.18±0.003              | 1.07±0.071     | U=260994.5, p=0.449 |
| Ever been injured or injured someone else through drinking alcohol (0: No, 1:Yes, but not in last year, 2:Yes, during the last year)                    | 0:55282, 1:3206, 2:321  | 0:20, 1:1, 2:0 | p>0.99              |
| Ever had known person concerned about, or recommend reduction of, alcohol consumption (0: No, 1:Yes, but not in last year, 2:Yes, during the last year) | 0:50820, 1:4072, 2:3847 | 0:19, 1:1, 2:1 | p>0.99              |
| Age when known person last commented about drinking habits (yrs)                                                                                        | 51.3±0.2                | 67.0±0.0       | U=464, p=0.196      |

**Cannabis use**

|                                                                                                                                                                   |            |            |                     |
|-------------------------------------------------------------------------------------------------------------------------------------------------------------------|------------|------------|---------------------|
| Ever taken cannabis (0:No, 1:1-2 times, 2:3-10 times, 3:11-100 times, 4: more than 100 times)                                                                     | 0.52±0.004 | 0.14±0.101 | U=517372.5, p=0.092 |
| Maximum frequency of taking cannabis (1:Less than once a month, 2:once a month or more but not every week, 3:once a week or more, but not every day, 4:Every day) | 1.70±0.008 | 1.00±0.000 | U=9036, p=0.293     |
| Age when last took cannabis (yrs)                                                                                                                                 | 33.2±0.1   | 23.0±2.0   | U=8252, p=0.279     |

**Unusual and psychotic experiences**



*Dual answer questions*

|                                                                                      |            |      |         |
|--------------------------------------------------------------------------------------|------------|------|---------|
| Ever seen an unreal vision (Yes/No)                                                  | 1562/56684 | 1/20 | p=0.435 |
| Ever heard an unreal voice (Yes/No)                                                  | 914/57657  | 0/21 | p>0.99  |
| Ever believed in unreal communications or signs (Yes/No)                             | 406/58263  | 0/21 | p>0.99  |
| Ever believed in unreal conspiracy against self (Yes/No)                             | 539/58134  | 0/21 | p>0.99  |
| Ever talked to a health professional about unusual or psychotic experiences (Yes/No) | 603/1965   | 0/1  | p>0.99  |
| Ever prescribed medication for unusual or psychotic experiences (Yes/No)             | 332/2232   | 0/1  | p>0.99  |

*Multiple answer questions*

|                                                                                                        |            |            |                  |
|--------------------------------------------------------------------------------------------------------|------------|------------|------------------|
| Number of times seen an unreal vision                                                                  | 33.1±1.9   | 192.0±0.0  | U=103, p=0.134   |
| Number of times heard an unreal voice                                                                  | 69.5±3.9   | -          | -                |
| Number of times believed in unreal communications or signs                                             | 75.1±5.4   | -          | -                |
| Number of times believed in unreal conspiracy against self                                             | 29.7±1.8   | -          | -                |
| Frequency of unusual or psychotic experiences in last year (0:Not at all-4: Nearly every day or daily) | 0.54±0.020 | 0.00±0.000 | U=896.5, p=0.516 |
| Age when first had unusual or psychotic experience (yrs)                                               | 35.9±0.5   | 15.0±0.0   | U=341.5, p=0.236 |
| Distress caused by unusual or psychotic experiences (0:Not distressing at all-4: Very distressing)     | 1.47±0.026 | 0.00±0.000 | U=328, p=0.186   |

**Traumatic events**

|                                                                                                                                        |                         |                |                     |
|----------------------------------------------------------------------------------------------------------------------------------------|-------------------------|----------------|---------------------|
| Felt loved as a child (0:Never true-4: Very often true)                                                                                | 3.23±0.004              | 3.05±0.288     | U=603250.5, p=0.863 |
| Someone to take to doctor when needed as a child (0:Never true-4: Very often true)                                                     | 3.76±0.003              | 3.90±0.066     | U=479201.5, 0.459   |
| Been in a confiding relationship as an adult (0:Never true-4: Very often true)                                                         | 3.00±0.005              | 3.19±0.245     | U=570132, p=0.613   |
| Able to pay rent/mortgage as an adult (0:Never true-4: Very often true)                                                                | 3.74±0.003              | 3.86±0.104     | U=590821, p=0.676   |
| Been in serious accident believed to be life-threatening (0:Never, 1:Yes, but not in last 12 months, 2:Yes, within the last 12 months) | 0:50989, 1:7578, 2:209  | 0:20, 1:1, 2:0 | p=0.545             |
| Been involved in combat or exposed to war zone (0:Never, 1:Yes, but not in last 12 months, 2:Yes, within the last 12 months)           | 0:55263, 1:3429, 2:63   | 0:20, 1:1, 2:0 | p>0.99              |
| Diagnosed with life-threatening illness (0:Never, 1:Yes, but not in last 12 months, 2:Yes, within the last 12 months)                  | 0:48114, 1:9006, 2:1547 | 0:15, 1:6, 2:0 | p=0.215             |
| Victim of physically violent crime (0:Never, 1:Yes, but not in last 12 months, 2:Yes, within the last 12 months)                       | 0:44349, 1:14083, 2:335 | 0:15, 1:6, 2:0 | p=0.657             |
| Witnessed sudden violent death (0:Never, 1:Yes, but not in last 12 months, 2:Yes, within the last 12 months)                           | 0:47486, 1:10851, 2:417 | 0:19, 1:2, 2:0 | p=0.487             |
| Avoided activities or situations because of previous stressful experience in past month (0:Not at all-4:Extremely)                     | 0.23±0.003              | 0.38±0.201     | U=571980.5, p=0.367 |
| Repeated disturbing thoughts of stressful experience in past month (0:Not at all-4:Extremely)                                          | 0.31±0.003              | 0.62±0.234     | U=541898.5, p=0.186 |
| Felt very upset when reminded of stressful experience in past month (0:Not at all-4:Extremely)                                         | 0.38±0.003              | 0.71±0.260     | U=544289, p=0.235   |
| Felt irritable or had angry outbursts in past month (0:Not at all-4:Extremely)                                                         | 0.57±0.005              | 1.20±0.389     | U=78051, p=0.078    |

|                                                                           |            |            |                     |
|---------------------------------------------------------------------------|------------|------------|---------------------|
| Felt distant from other people in past month (0:Not at all-4:Extremely)   | 0.64±0.006 | 0.30±0.153 | U=91915, p=0.328    |
| <b>Happiness and subjective wellbeing</b>                                 |            |            |                     |
| General happiness (1:Extremely happy-6:Extremely unhappy)                 | 2.40±0.003 | 2.62±0.212 | U=545238, p=0.326   |
| General happiness with own health (1:Extremely happy-6:Extremely unhappy) | 2.63±0.004 | 2.81±0.281 | U=566695, p=0.491   |
| Belief that own life is meaningful (1:Not at all-5:an extreme amount)     | 3.69±0.003 | 3.48±0.245 | U=556178.5, p=0.518 |

**Supplementary Table 8.** Mental Health Questionnaire (MHQ) responses in female deletion carriers and female controls.

**Depression***Dual answer questions*

|                                                                       | Female control       | Female deletion | Statistics                     |
|-----------------------------------------------------------------------|----------------------|-----------------|--------------------------------|
| Ever had prolonged feelings of sadness or depression? (Yes/No)        | 48061/28148          | 61/33           | $\chi^2[1]=0.068$ , $p=0.795$  |
| Ever had prolonged loss of interest in normal activities? (Yes/No)    | 34628/41541          | 46/48           | $\chi^2[1]=0.328$ , $p=0.567$  |
| Depression possibly related to stressful or traumatic event (Yes/No)  | 38341/10536          | 46/15           | $\chi^2[1]=0.176$ , $p=0.674$  |
| Feelings of tiredness during worst episode of depression (Yes/No)     | 37680/6401           | 53/8            | $\chi^2[1]=0.017$ , $p=0.897$  |
| Did your sleep change? (Yes/No)                                       | 34919/7056           | 47/8            | $\chi^2[1]=0.0072$ , $p=0.788$ |
| Trouble falling asleep (Yes/No)                                       | 26474/8445           | 33/14           | $\chi^2[1]=0.527$ , $p=0.468$  |
| Sleeping too much (Yes/No)                                            | 7305/27614           | 15/32           | $\chi^2[1]=2.796$ , $p=0.094$  |
| Waking too early (Yes/No)                                             | 26601(76%)/8318(24%) | 29(62%)/18(38%) | $\chi^2[1]=4.650$ , $p=0.031$  |
| Difficulty concentrating during worst depression (Yes/No)             | 34573/8215           | 47/11           | $\chi^2[1]=0.000$ , $p>0.99$   |
| Feelings of worthlessness during worst episode of depression (Yes/No) | 23734/21821          | 32/29           | $\chi^2[1]=0.000$ , $p>0.99$   |
| Thoughts of death during worst depression (Yes/No)                    | 25425/20559          | 29/30           | $\chi^2[1]=0.667$ , $p=0.414$  |
| Depression possibly related to childbirth (Yes/No)                    | 5592/38405           | 4/50            | $\chi^2[1]=0.931$ , $p=0.335$  |
| Professional informed about depression (Yes/No)                       | 33629/15198          | 36/24           | $\chi^2[1]=1.806$ , $p=0.179$  |
| Substances taken for depression (unprescribed)(Yes/No)                | 3433/73006           | 4/91            | $p>0.99$                       |
| Substances taken for depression (prescribed)(Yes/No)                  | 22619/53820          | 25/70           | $\chi^2[1]=0.344$ , $p=0.558$  |
| Substances taken for depression (drugs or alcohol)(Yes/No)            | 5131/71308           | 5/90            | $\chi^2[1]=0.129$ , $p=0.720$  |
| Talking therapies (Yes/No)                                            | 20634/55805          | 17/78           | $\chi^2[1]=3.539$ , $p=0.060$  |
| Other non-drug therapies (e.g. yoga) (Yes/No)                         | 8083/68356           | 5/90            | $\chi^2[1]=2.298$ , $p=0.130$  |

*Multiple answer questions*

|                                                                                                       |            |            |                        |
|-------------------------------------------------------------------------------------------------------|------------|------------|------------------------|
| Trouble falling or staying asleep, or sleeping too much (1: not at all-4:nearly every day)            | 1.91±0.005 | 1.94±0.138 | U=3619934, $p=0.988$   |
| Recent feelings of inadequacy (1: not at all-4:nearly every day)                                      | 1.36±0.004 | 1.33±0.098 | U=3554178.5, $p=0.716$ |
| Recent trouble concentrating on things (1: not at all-4:nearly every day)                             | 1.30±0.003 | 1.38±0.092 | U=3434322.5, $p=0.190$ |
| Recent feelings of depression (1: not at all-4:nearly every day)                                      | 1.36±0.003 | 1.40±0.096 | U=3385837, $p=0.230$   |
| Recent poor appetite or overeating (1: not at all-4:nearly every day)                                 | 1.40±0.004 | 1.37±0.106 | U=3612522.5, $p=0.943$ |
| Recent thoughts of suicide or self-harm (1: not at all-4:nearly every day)                            | 1.07±0.002 | 1.10±0.063 | U=3556579, $p=0.549$   |
| Recent lack of interest or pleasure in doing things (1: not at all-4:nearly every day)                | 1.31±0.003 | 1.48±0.118 | U=3351972.5, $p=0.070$ |
| Recent changes in speed/amount of moving or speaking (1: not at all-4:nearly every day)               | 1.10±0.002 | 1.13±0.055 | U=3530409, $p=0.287$   |
| Recent feelings of tiredness or low energy (1: not at all-4:nearly every day)                         | 1.82±0.005 | 2.00±0.135 | U=3187494.5, $p=0.026$ |
| Fraction of day affected during worst episode of depression (1:less than half the day-4:all day long) | 2.94±0.005 | 2.94±0.136 | U=1332636, $p=0.458$   |

|                                                                                                                                                             |                                                                            |                                                                 |                      |
|-------------------------------------------------------------------------------------------------------------------------------------------------------------|----------------------------------------------------------------------------|-----------------------------------------------------------------|----------------------|
| Frequency of depressed days during worst episode of depression (1:less often-3:every day)                                                                   | 2.39±0.003<br>0:13555(32%),<br>1:8175(19%),<br>2:17686(42%),<br>3:2935(7%) | 2.29±0.088<br>0:23(38%),<br>1:18(30%),<br>2:16(27%),<br>3:3(5%) | U=1348177.5, p=0.281 |
| Weight change during worst episode of depression (0: stayed about the same or was on a diet, 1:gained weight, 2:lost weight, 3:both gained and lost weight) |                                                                            |                                                                 | p=0.046              |
| Duration of worst depression (1:less than a month-6:over two years)                                                                                         | 3.16±0.008                                                                 | 3.40±0.229                                                      | U=1319400, p=0.232   |
| Impact on normal roles during worst episode of depression (0:not at all-3:a lot)                                                                            | 1.96±0.005                                                                 | 2.06±0.130                                                      | U=1392219, p=0.240   |
| Age at first episode of depression (yrs)                                                                                                                    | 36.46±0.076                                                                | 36.60±2.014                                                     | U=1271678.5, p=0.903 |
| Age at last episode of depression (yrs)                                                                                                                     | 49.75±0.066                                                                | 50.52±2.003                                                     | U=1218252.5, p=0.478 |
| Lifetime number of depressed periods                                                                                                                        | 127.43±1.708                                                               | 136.71±47.624                                                   | U=1373136, p=0.834   |

### Mania

#### Dual answer questions

|                                                                                 |                     |               |                             |
|---------------------------------------------------------------------------------|---------------------|---------------|-----------------------------|
| Manifestations of mania (more talkative than usual) (Yes/No)                    | 3418/73021          | 5/90          | p=0.618                     |
| Manifestations of mania (more restless than usual)(Yes/No)                      | 8175/68264          | 11/84         | $\chi^2[1]=0.013$ , p=0.910 |
| Manifestations of mania (my thoughts were racing)(Yes/No)                       | 6868/69571          | 9/86          | $\chi^2[1]=0.000$ , p>0.99  |
| Manifestations of mania (needed less sleep than usual)(Yes/No)                  | 2446/73993          | 3/92          | p>0.99                      |
| Manifestations of mania (more creative than usual)(Yes/No)                      | 1629/74810          | 3/92          | p=0.459                     |
| Manifestations of mania (was easily distracted)(Yes/No)                         | 6050/70389          | 9/86          | $\chi^2[1]=0.139$ , p=0.710 |
| Manifestations of mania (was more confident than usual)(Yes/No)                 | 1788/74651          | 2/93          | p>0.99                      |
| Manifestations of mania (was more active than usual)(Yes/No)                    | 3560/72879          | 6/89          | p=0.457                     |
| Ever had a period of mania/excitability? (Yes/No)                               | 2699(4%)/72286(96%) | 8(9%)/86(91%) | p=0.020                     |
| Ever had a period of extreme irritability? (Yes/No)                             | 19708/54139         | 28/64         | $\chi^2[1]=0.482$ , p=0.488 |
| Severity of problems due to mania or irritability (No problems/caused problems) | 12387/4893          | 17/7          | $\chi^2[1]=0.000$ , p>0.99  |

#### Multiple answer questions

|                                                                                |            |            |                   |
|--------------------------------------------------------------------------------|------------|------------|-------------------|
| Longest period of mania or irritability (1: less than 24hrs-3: a week or more) | 1.87±0.006 | 1.96±0.146 | U=226797, p=0.504 |
|--------------------------------------------------------------------------------|------------|------------|-------------------|

### Anxiety

*Dual answer questions*

|                                                                                               |                     |               |                               |
|-----------------------------------------------------------------------------------------------|---------------------|---------------|-------------------------------|
| Ever felt worried, tense or anxious for most of a month or longer (Yes/No)                    | 21663/48664         | 29/58         | $\chi^2[1]=0.156$ , $p=0.693$ |
| Ever worried more than most people would in similar situation (Yes/No)                        | 18547/44811         | 24/58         | $\chi^2[1]=0.000$ , $p>0.99$  |
| Stronger worrying (than other people) during period of worst anxiety (Yes/No)                 | 15018/3472          | 20/6          | $p=0.614$                     |
| Worried most days during period of worst anxiety (Yes/No)                                     | 23462/2607          | 30/4          | $p=0.772$                     |
| Number of things worried about during worst period of anxiety (One thing/More than one thing) | 11030/15252         | 14/19         | $\chi^2[1]=0.000$ , $p>0.99$  |
| Difficulty stopping worrying during worst period of anxiety (Yes/No)                          | 25033/1270          | 31/3          | $p=0.225$                     |
| Multiple worries during worst period of anxiety (Yes/No)                                      | 20153/5710          | 22/12         | $\chi^2[1]=2.721$ , $p=0.099$ |
| Tense, sore or aching muscles during worse period of anxiety (Yes/No)                         | 10714/13835         | 17/15         | $\chi^2[1]=0.814$ , $p=0.367$ |
| Difficulty concentrating during worst period of anxiety (Yes/No)                              | 19580/6073          | 28/7          | $\chi^2[1]=0.097$ , $p=0.755$ |
| More irritable than usual during worst period of anxiety (Yes/No)                             | 17422/7083          | 29/4          | $\chi^2[1]=3.739$ , $p=0.053$ |
| Restless during period of worst anxiety (Yes/No)                                              | 14721/10128         | 24/10         | $\chi^2[1]=1.371$ , $p=0.242$ |
| Keyed up or on edge during worst period of anxiety (Yes/No)                                   | 20731/4966          | 26/7          | $\chi^2[1]=0.003$ , $p=0.957$ |
| Frequent trouble falling or staying asleep during worst period of anxiety (Yes/No)            | 22484/3855          | 27/7          | $p=0.329$                     |
| Easily tired during worst period of anxiety (Yes/No)                                          | 19085/6157          | 26/9          | $\chi^2[1]=0.000$ , $p>0.99$  |
| Professional informed about anxiety (Yes/No)                                                  | 16979/9893          | 19/16         | $\chi^2[1]=0.838$ , $p=0.360$ |
| Substances taken for anxiety (unprescribed)(Yes/No)                                           | 2501(3%)/73938(97%) | 7(7%)/88(93%) | <b><math>p=0.037</math></b>   |
| Substances taken for anxiety (prescribed)(Yes/No)                                             | 11511/64928         | 13/82         | $\chi^2[1]=0.053$ , $p=0.817$ |
| Substances taken for anxiety (drugs or alcohol) (Yes/No)                                      | 3964/72475          | 4/91          | $p>0.99$                      |
| Activities undertaken to treat anxiety (talking therapies)(Yes/No)                            | 11601/64838         | 11/84         | $\chi^2[1]=0.695$ , $p=0.404$ |
| Activities undertaken to treat anxiety (other therapeutic activities e.g. yoga)(Yes/No)       | 5843/70596          | 3/92          | $\chi^2[1]=2.108$ , $p=0.147$ |

*Multiple answer questions*

|                                                                                          |            |            |                                                     |
|------------------------------------------------------------------------------------------|------------|------------|-----------------------------------------------------|
| Recent easy annoyance or irritability (1: not at all-4:nearly every day)                 | 1.34±0.002 | 1.44±0.061 | <b><math>U=3213617</math>, <math>p=0.018</math></b> |
| Recent feelings of nervousness or anxiety (1: not at all-4:nearly every day)             | 1.41±0.002 | 1.42±0.073 | $U=3594330$ , $p=0.913$                             |
| Recent inability to stop or control worrying (1: not at all-4:nearly every day)          | 1.37±0.002 | 1.51±0.087 | $U=3308660$ , $p=0.113$                             |
| Recent feelings of foreboding (1: not at all-4:nearly every day)                         | 1.26±0.002 | 1.34±0.069 | $U=3340145$ , $p=0.118$                             |
| Recent trouble relaxing (1: not at all-4:nearly every day)                               | 1.43±0.003 | 1.52±0.086 | $U=3477052$ , $p=0.428$                             |
| Recent restlessness (1: not at all-4:nearly every day)                                   | 1.17±0.002 | 1.25±0.060 | $U=3380896$ , $p=0.059$                             |
| Recent worrying too much about different things (1: not at all-4:nearly every day)       | 1.47±0.003 | 1.53±0.090 | $U=3545082$ , $p=0.872$                             |
| Longest period spent worried or anxious (months)                                         | 190±2      | 164±63     | $U=289967.5$ , $p=0.471$                            |
| Frequency of inability to stop worrying during worst period of anxiety (0:Never-3:Often) | 2.32±0.004 | 2.40±0.131 | $U=428042$ , $p=0.328$                              |

|                                                                                            |            |            |                   |
|--------------------------------------------------------------------------------------------|------------|------------|-------------------|
| Frequency of difficulty controlling worry during worst period of anxiety (0:Never-3:Often) | 2.35±0.004 | 2.49±0.126 | U=406215, p=0.138 |
| Impact on normal roles during worst period of anxiety (0: Not at all-3: A lot)             | 1.84±0.006 | 2.20±0.152 | U=371698, p=0.022 |

**Addictions**

|                                                                       |            |      |         |
|-----------------------------------------------------------------------|------------|------|---------|
| Ever addicted to any substance or behaviour (Yes/No)                  | 3820/71829 | 3/91 | p=0.634 |
| Ever addicted to alcohol (Yes/No)                                     | 1340/2213  | 2/1  | p=0.561 |
| Ongoing addiction to alcohol (Yes/No)                                 | 579/741    | 1/1  | p>0.99  |
| Ever physically dependent on alcohol (Yes/No)                         | 279/997    | 0/2  | p>0.99  |
| Ever addicted to prescription or over-the-counter medication (Yes/No) | 670/3093   | 1/2  | p=0.445 |
| Ever addicted to illicit or recreational drugs (Yes/No)               | 217/3579   | 0/3  | p>0.99  |
| Ever addicted to a behaviour or miscellaneous                         | 643/3145   | 1/2  | p=0.428 |
| Ongoing behavioural or miscellaneous addiction (Yes/No)               | 327/302    | 1/0  | p>0.99  |

**Alcohol use**

|                                                                                                                                                         |                         |                |                      |
|---------------------------------------------------------------------------------------------------------------------------------------------------------|-------------------------|----------------|----------------------|
| Frequency of drinking alcohol (0: Never-4: 4 or more times a week)                                                                                      | 2.43±0.005              | 2.31±0.136     | U=3429009.5, p=0.345 |
| Amount of alcohol drunk on a typical drinking day (1: 1-2 units-5: 10 or more units)                                                                    | 1.60±0.003              | 1.44±0.092     | U=2542520, p=0.033   |
| Frequency of consuming 6 or more units of alcohol (1: Never-5: daily or almost daily)                                                                   | 1.69±0.004              | 1.56±0.102     | U=2758770, p=0.304   |
| Frequency of inability to cease drinking in last year (1: Never-5: daily or almost daily)                                                               | 1.22±0.004              | 1.06±0.056     | U=556594.5, p=0.076  |
| Frequency of failure to fulfil normal expectations due to drinking alcohol in last year (1: Never-5: daily or almost daily)                             | 1.08±0.002              | 1.03±0.028     | U=594290.5, p=0.341  |
| Frequency of needing morning drink of alcohol after heavy drinking session in last year (1: Never-5: daily or almost daily)                             | 1.01±0.001              | 1.06±0.056     | U=604122, p=0.012    |
| Frequency of feeling guilt or remorse after drinking alcohol in last year (1: Never-5: daily or almost daily)                                           | 1.33±0.004              | 1.11±0.053     | U=544904, p=0.090    |
| Frequency of memory loss due to drinking alcohol in the last year (1: Never-5: daily or almost daily)                                                   | 1.17±0.003              | 1.14±0.099     | U=573224, p=0.200    |
| Ever been injured or injured someone else through drinking alcohol (0: No, 1:Yes, but not in last year, 2:Yes, during the last year)                    | 0:74194, 1:1897, 2:302  | 0:93, 1:2, 2:0 | p>0.99               |
| Ever had known person concerned about, or recommend reduction of, alcohol consumption (0: No, 1:Yes, but not in last year, 2:Yes, during the last year) | 0:72584, 1:2059, 2:1695 | 0:90, 1:3, 2:2 | p=0.865              |
| Age when known person last commented about drinking habits (yrs)                                                                                        | 50.1±0.3                | 47.3±10.7      | U=2607, p=0.908      |

**Cannabis use**

|                                                                                                                                                                   |            |            |                      |
|-------------------------------------------------------------------------------------------------------------------------------------------------------------------|------------|------------|----------------------|
| Ever taken cannabis (0:No, 1:1-2 times, 2:3-10 times, 3:11-100 times, 4: more than 100 times)                                                                     | 0.35±0.003 | 0.25±0.062 | U=3573919.5, p=0.720 |
| Maximum frequency of taking cannabis (1:Less than once a month, 2:once a month or more but not every week, 3:once a week or more, but not every day, 4:Every day) | 1.57±0.008 | 1.24±0.161 | U=93387, p=0.092     |
| Age when last took cannabis (yrs)                                                                                                                                 | 31.1±0.1   | 31.9±3.0   | U=115429.5, p=0.744  |

**Unusual and psychotic experiences***Dual answer questions*

|                                                                                      |            |      |         |
|--------------------------------------------------------------------------------------|------------|------|---------|
| Ever seen an unreal vision (Yes/No)                                                  | 2692/72930 | 4/90 | p=0.579 |
| Ever heard an unreal voice (Yes/No)                                                  | 1384/74696 | 2/93 | p=0.692 |
| Ever believed in unreal communications or signs (Yes/No)                             | 530/75688  | 2/93 | p=0.142 |
| Ever believed in unreal conspiracy against self (Yes/No)                             | 498/75783  | 1/94 | p=0.464 |
| Ever talked to a health professional about unusual or psychotic experiences (Yes/No) | 777/3188   | 2/4  | p=0.335 |
| Ever prescribed medication for unusual or psychotic experiences (Yes/No)             | 388/3572   | 2/4  | p=0.111 |

*Multiple answer questions*

|                                                                                                        |            |             |                    |
|--------------------------------------------------------------------------------------------------------|------------|-------------|--------------------|
| Number of times seen an unreal vision                                                                  | 31.8±1.4   | 49.3±46.9   | U=3719, p=0.518    |
| Number of times heard an unreal voice                                                                  | 55.7±2.9   | 103.5±106.5 | U=998.5, p=0.831   |
| Number of times believed in unreal communications or signs                                             | 62.6±4.5   | 107.5±102.5 | U=239, p=0.279     |
| Number of times believed in unreal conspiracy against self                                             | 26.1±1.8   | 30.0±0.0    | U=121.5, p=0.474   |
| Frequency of unusual or psychotic experiences in last year (0:Not at all-4: Nearly every day or daily) | 0.42±0.013 | 0.67±0.494  | U=10899.5, p=0.638 |
| Age when first had unusual or psychotic experience (yrs)                                               | 34.7±0.4   | 48.2±10.4   | U=7062, p=0.182    |
| Distress caused by unusual or psychotic experiences (0:Not distressing at all-4: Very distressing)     | 1.41±0.021 | 1.83±0.749  | U=10298.5, p=0.606 |

**Traumatic events**

|                                                                                                                                        |                                            |                 |                      |
|----------------------------------------------------------------------------------------------------------------------------------------|--------------------------------------------|-----------------|----------------------|
| Felt loved as a child (0:Never true-4: Very often true)                                                                                | 3.24±0.004                                 | 3.32±0.095      | U=3471803, p=0.457   |
| Someone to take to doctor when needed as a child (0:Never true-4: Very often true)                                                     | 3.73±0.003                                 | 3.85±0.043      | U=3404766, p=0.243   |
| Been in a confiding relationship as an adult (0:Never true-4: Very often true)                                                         | 2.98±0.005                                 | 2.99±0.138      | U=3338756.5, p=0.856 |
| Able to pay rent/mortgage as an adult (0:Never true-4: Very often true)                                                                | 3.70±0.003                                 | 3.61±0.100      | U=3424319, p=0.570   |
| Been in serious accident believed to be life-threatening (0:Never, 1:Yes, but not in last 12 months, 2:Yes, within the last 12 months) | 0:71274, 1:4882, 2:174                     | 0:83, 1:12, 2:0 | p=0.060              |
| Been involved in combat or exposed to war zone (0:Never, 1:Yes, but not in last 12 months, 2:Yes, within the last 12 months)           | 0:75355, 1:1002, 2:23<br>0:64635, 1:10067, | 0:95, 1:0, 2:0  | p=0.650              |
| Diagnosed with life-threatening illness (0:Never, 1:Yes, but not in last 12 months, 2:Yes, within the last 12 months)                  | 2:1371<br>0:65682, 1:10283,                | 0:78, 1:16, 2:0 | p=0.293              |
| Victim of physically violent crime (0:Never, 1:Yes, but not in last 12 months, 2:Yes, within the last 12 months)                       | 2:283                                      | 0:81, 1:13, 2:0 | p=0.916              |
| Witnessed sudden violent death (0:Never, 1:Yes, but not in last 12 months, 2:Yes, within the last 12 months)                           | 0:69572, 1:6424, 2:295                     | 0:87, 1:8, 2:0  | p>0.99               |
| Avoided activities or situations because of previous stressful experience in past month (0:Not at all-4:Extremely)                     | 0.34±0.003                                 | 0.52±0.094      | U=3269628, p=0.026   |
| Repeated disturbing thoughts of stressful experience in past month (0:Not at all-4:Extremely)                                          | 0.44±0.003                                 | 0.53±0.084      | U=3361072, p=0.129   |

|                                                                                                |            |            |                      |
|------------------------------------------------------------------------------------------------|------------|------------|----------------------|
| Felt very upset when reminded of stressful experience in past month (0:Not at all-4:Extremely) | 0.62±0.003 | 0.76±0.097 | U=3308762, p=0.099   |
| Felt irritable or had angry outbursts in past month (0:Not at all-4:Extremely)                 | 0.49±0.004 | 0.63±0.119 | U=951869.5, p=0.217  |
| Felt distant from other people in past month (0:Not at all-4:Extremely)                        | 0.64±0.005 | 0.78±0.131 | U=941187, p=0.179    |
| <b>Happiness and subjective wellbeing</b>                                                      |            |            |                      |
| General happiness (1:Extremely happy-6:Extremely unhappy)                                      | 2.42±0.003 | 2.42±0.092 | U=3560178, p=0.812   |
| General happiness with own health (1:Extremely happy-6:Extremely unhappy)                      | 2.63±0.003 | 2.59±0.087 | U=3566806.5, p=0.795 |
| Belief that own life is meaningful (1:Not at all-5:an extreme amount)                          | 3.70±0.003 | 3.70±0.114 | U=3317623, p=0.285   |

**Supplementary Table 9.** List of medications commonly used to treat heart arrhythmia, ADHD-related symptoms and mood symptoms.



| Drug type                             | Effect on symptoms                                                | Biobank Code | Drug                                                         |
|---------------------------------------|-------------------------------------------------------------------|--------------|--------------------------------------------------------------|
| Beta-blocker                          | Anti-arrhythmia                                                   | 1140866738   | atenolol                                                     |
|                                       | Anti-arrhythmia                                                   | 1141146126   | atenolol+bendrofluazide                                      |
|                                       | Anti-arrhythmia                                                   | 1141194810   | atenolol+bendroflumethiazide                                 |
|                                       | Anti-arrhythmia                                                   | 1141180778   | atenolol+chlorthalidone                                      |
|                                       | Anti-arrhythmia                                                   | 1141146124   | atenolol+chlorthalidone                                      |
|                                       | Anti-arrhythmia                                                   | 1141146128   | atenolol+co-amilozide                                        |
|                                       | Anti-arrhythmia                                                   | 1140860426   | atenolol+nifedipine 50mg/20mg m/r capsule                    |
|                                       | Anti-arrhythmia                                                   | 1140879760   | bisoprolol                                                   |
|                                       | Anti-arrhythmia                                                   | 1140864950   | bisoprolol fumarate+hydrochlorothiazide 10mg/6.25mg tablet   |
|                                       | Anti-arrhythmia                                                   | 1140879818   | metoprolol                                                   |
|                                       | Anti-arrhythmia                                                   | 1140860308   | metoprolol tartrate+chlorthalidone 100mg/12.5mg tablet       |
|                                       | Anti-arrhythmia                                                   | 1140879854   | sotalol                                                      |
|                                       | Anti-arrhythmia                                                   | 1140860332   | sotalol hydrochloride+hydrochlorothiazide 80mg/12.5mg tablet |
|                                       | Anti-arrhythmia                                                   | 1140860404   | metoprolol tartrate+hydrochlorothiazide 100mg/12.5mg tablet  |
| Calcium channel blocker               | Anti-arrhythmia                                                   | 1140888510   | verapamil                                                    |
|                                       | Anti-arrhythmia                                                   | 1140879806   | diltiazem                                                    |
|                                       | Anti-arrhythmia                                                   | 1140926778   | diltiazem hcl+hydrochlorothiazide 150mg/12.5mg m/r capsule   |
| Cardiac glycoside                     | Anti-arrhythmia                                                   | 2038459814   | digoxin                                                      |
|                                       | Anti-arrhythmia                                                   | 1140865966   | digoxin product                                              |
| Sodium channel blocker                | Anti-arrhythmia                                                   | 1140888570   | flecainide                                                   |
| Calcium and potassium channel blocker | Anti-arrhythmia                                                   | 1140888502   | amiodarone                                                   |
|                                       | Reduction in inattention, hyperactivity and/or impulsive symptoms | 1140867894   | pemoline                                                     |
|                                       | Reduction in inattention, hyperactivity and/or impulsive symptoms | 1140917138   | ritalin 10mg tablet                                          |
| Centrally Acting Sympathomimetics     | Reduction in inattention, hyperactivity and/or impulsive symptoms | 1141199446   | atomoxetine                                                  |
|                                       | Reduction in inattention, hyperactivity and/or impulsive symptoms | 1141180976   | dexamfetamine                                                |
|                                       | Reduction in inattention, hyperactivity and/or impulsive symptoms | 1140879680   | dexamphetamine                                               |
| Tricyclic Antidepressants             | Antidepressant/treatment of mood symptoms                         | 1140867938   | amitriptyline+chlorthalidone 12.5mg/5mg capsule              |

|                                                   |                                           |            |                         |
|---------------------------------------------------|-------------------------------------------|------------|-------------------------|
| Monoamine Oxidase A Inhibitors Reversible         | Antidepressant/treatment of mood symptoms | 1140867920 | moclobemide             |
| Monoamine Oxidase A and B Inhibitors Irreversible | Antidepressant/treatment of mood symptoms | 1140867914 | tranylcypromine         |
| Selective Serotonin Reuptake Inhibitors           | Antidepressant/treatment of mood symptoms | 1140867888 | paroxetine              |
| Selective Serotonin Reuptake Inhibitors           | Antidepressant/treatment of mood symptoms | 1140867878 | sertraline              |
| Monoamine Oxidase A and B Inhibitors Irreversible | Antidepressant/treatment of mood symptoms | 1140867856 | isocarboxazid           |
|                                                   | Antidepressant/treatment of mood symptoms | 1140867852 | nardil 15mg tablet      |
| Monoamine Oxidase A and B Inhibitors Irreversible | Antidepressant/treatment of mood symptoms | 1140867850 | phenelzine              |
| Tricyclic Antidepressants                         | Antidepressant/treatment of mood symptoms | 1140867818 | nortriptyline           |
|                                                   | Antidepressant/treatment of mood symptoms | 1140867812 | norval 10mg tablet      |
| Tetracyclic Antidepressants                       | Antidepressant/treatment of mood symptoms | 1140867774 | amoxapine               |
| Tricyclic Antidepressants                         | Antidepressant/treatment of mood symptoms | 1140867756 | trimipramine            |
| Tricyclic Antidepressants                         | Antidepressant/treatment of mood symptoms | 1140867726 | lofepramine             |
| Tricyclic Antidepressants                         | Antidepressant/treatment of mood symptoms | 1140867640 | doxepin                 |
| Tricyclic Antidepressants                         | Antidepressant/treatment of mood symptoms | 1140867632 | dothapax 25mg capsule   |
| Tricyclic Antidepressants                         | Antidepressant/treatment of mood symptoms | 1140867624 | prothiaden 25mg capsule |
|                                                   | Antidepressant/treatment of mood symptoms | 1140856074 | butriptyline            |
| Tricyclic Antidepressants                         | Antidepressant/treatment of mood symptoms | 1140909806 | dosulepin               |
| Monoamine Oxidase A and B Inhibitors Irreversible | Antidepressant/treatment of mood symptoms | 1140910504 | maoi - isocarboxazid    |
| Monoamine Oxidase A and B Inhibitors Irreversible | Antidepressant/treatment of mood symptoms | 1140910704 | maoi - phenelzine       |
| Monoamine Oxidase A and B Inhibitors Irreversible | Antidepressant/treatment of mood symptoms | 1140910820 | maoi - tranylcypromine  |
| Serotonin and Noradrenaline Reuptake Inhibitors   | Antidepressant/treatment of mood symptoms | 1140916282 | venlafaxine             |
|                                                   | Antidepressant/treatment of mood symptoms | 1140917460 | nefazodone              |
| Selective Serotonin Reuptake Inhibitors           | Antidepressant/treatment of mood symptoms | 1140921600 | citalopram              |
| Noradrenaline Reuptake Inhibitors                 | Antidepressant/treatment                  | 1141151978 | reboxetine              |

|                                                 |                                           |            |                        |
|-------------------------------------------------|-------------------------------------------|------------|------------------------|
|                                                 | of mood symptoms                          |            |                        |
| Tetracyclic Antidepressants                     | Antidepressant/treatment of mood symptoms | 1141152732 | mirtazapine            |
| Serotonin and Noradrenaline Reuptake Inhibitors | Antidepressant/treatment of mood symptoms | 1141176854 | bupropion              |
| Selective Serotonin Reuptake Inhibitors         | Antidepressant/treatment of mood symptoms | 1141180212 | escitalopram           |
| Serotonin and Noradrenaline Reuptake Inhibitors | Antidepressant/treatment of mood symptoms | 1141200564 | duloxetine             |
| Serotonin Uptake Inhibitors                     | Antidepressant/treatment of mood symptoms | 1140882244 | molipaxin 50mg capsule |
| Serotonin Receptor Agonists                     | Antidepressant/treatment of mood symptoms | 1140879730 | buspirone              |
| Monoamine Oxidase B Inhibitors                  | Antidepressant/treatment of mood symptoms | 1140879668 | selegiline             |
| Serotonin Uptake Inhibitors                     | Antidepressant/treatment of mood symptoms | 1140879634 | trazodone              |
| Tricyclic Antidepressants                       | Antidepressant/treatment of mood symptoms | 1140879632 | protriptyline          |
| Tricyclic Antidepressants                       | Antidepressant/treatment of mood symptoms | 1140879630 | imipramine             |
|                                                 | Antidepressant/treatment of mood symptoms | 1140879628 | dothiepin              |
|                                                 | Antidepressant/treatment of mood symptoms | 1140879624 | desipramine            |
| Tricyclic Antidepressants                       | Antidepressant/treatment of mood symptoms | 1140879620 | clomipramine           |
| Tricyclic Antidepressants                       | Antidepressant/treatment of mood symptoms | 1140879616 | amitriptyline          |
| Tetracyclic Antidepressants                     | Antidepressant/treatment of mood symptoms | 1140879556 | mianserin              |
| Selective Serotonin Reuptake Inhibitors         | Antidepressant/treatment of mood symptoms | 1140879544 | fluvoxamine            |
| Selective Serotonin Reuptake Inhibitors         | Antidepressant/treatment of mood symptoms | 1140879540 | fluoxetine             |
